# Supplementary material for: LRRC15 Targeting in Soft-Tissue Sarcomas: Biological and Clinical Implications
Source: MDPI journal article supplement (doi:10.3390/cancers12030757), 2020-03-23

# LRRC15 Targeting in Soft-Tissue Sarcomas: Biological and Clinical Implications

Eytan Ben-Ami, Raul Perret, Ying Huang, Félicie Courgeon, Prafulla Gokhale, Audrey Laroche-Clary, Benjamin Eschle, Valérie Velasco, François Le Loarer, Marie-Paule Algeo, James Purcell, George Demetri and Antoine Italiano

## Supplementary Materials

**Supplementary Table S1.** LRRC15 expression according to grade.

| Tumour characteristic |   | LRRC15 expression |        | Total |
|-----------------------|---|-------------------|--------|-------|
|                       |   | Low *             | High * |       |
| Grade                 | 1 | 17                | 1      | 18    |
|                       | 2 | 112               | 13     | 125   |
|                       | 3 | 221               | 60     | 281   |
| Total                 |   | 350               | 74     | 424   |

\* Low LRRC15 expression (H score  $\leq 160$ ); High LRRC15 expression (H score  $> 160$ ).

(A)

(B)

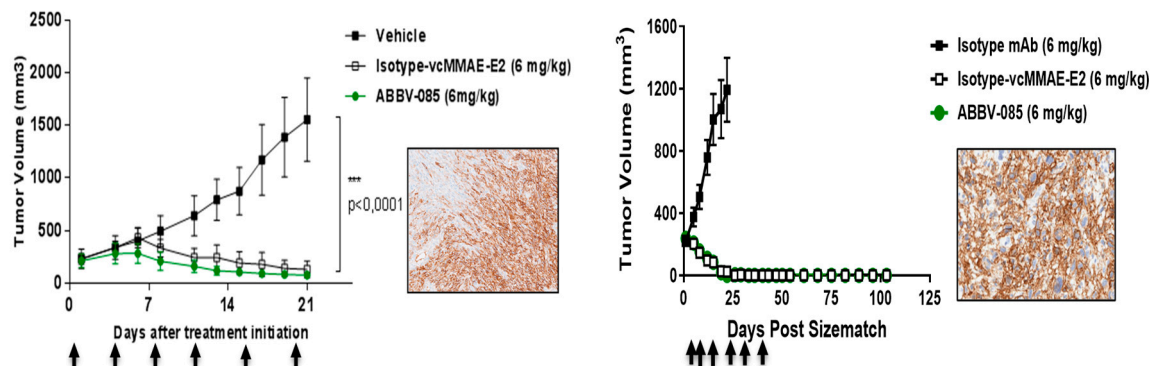

**Supplementary Figure S1.** Preclinical activity of ABBV-085 in LRRC15-positive UPS patient derived xenograft models (A: JR588 and B: UPS7).

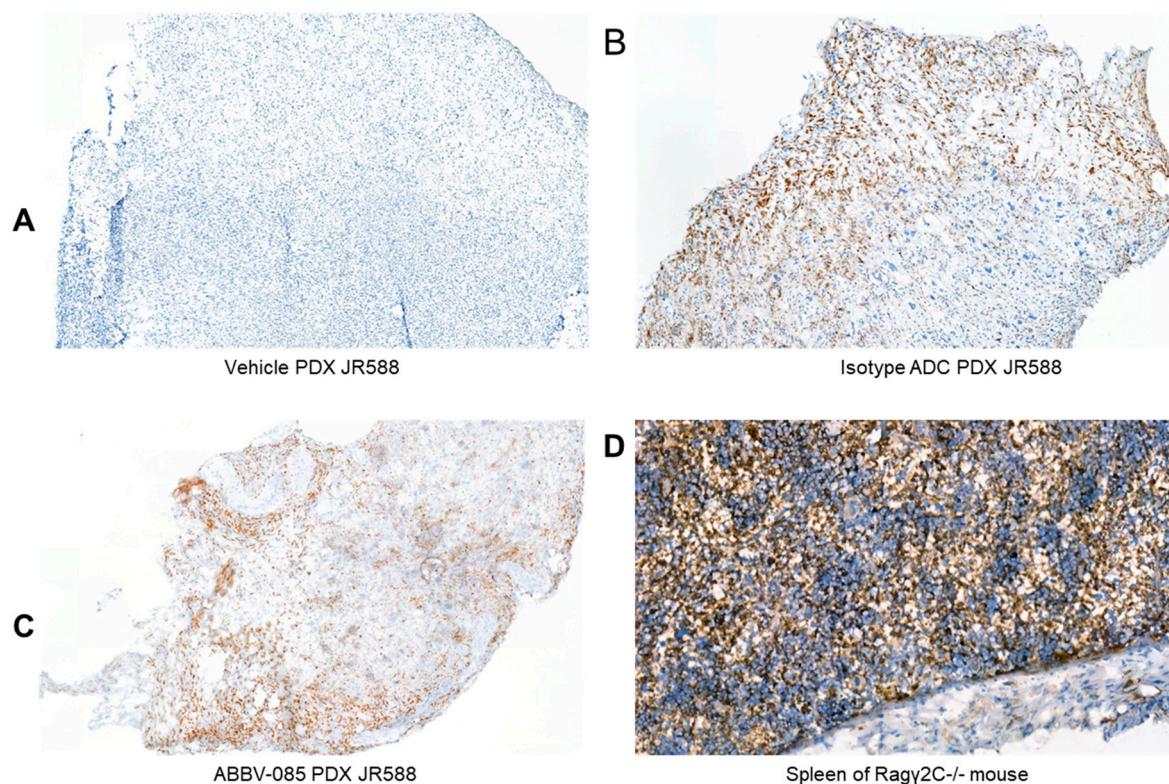

**Supplementary Figure S2.** Immunohistostaining of macrophages (F4/80) on PDX JR588 paraffin slices of treated mouse by (A) Vehicle, (B) Isotype ADC, (C) ABBV-085 antibody. (D) Control of F4/80 immunostaining on a Ragy2C<sup>-/-</sup> spleen paraffin slice.

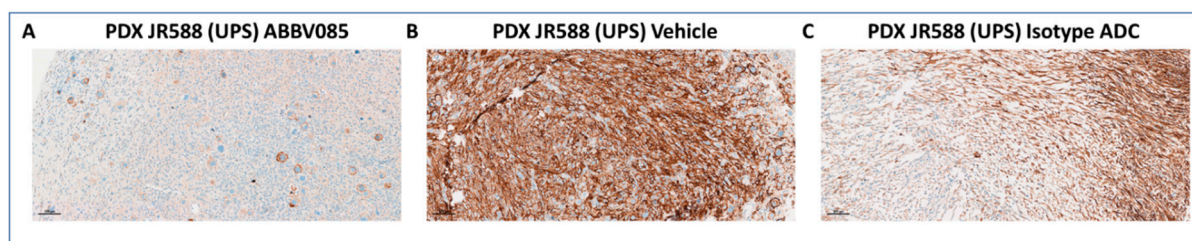

**Supplementary Figure S3.** LRRC15 expression on PDX JR588 paraffin slices of treated mouse by (A) ABBV-085, (B) Vehicle (C) Isotype.

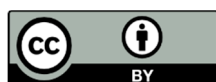

Supplement: s1 [file s1]
